# Supplementary material for: Unraveling Cellular and Molecular Mechanisms of Relapse in CD19/CD22 Dual-Targeting CAR T Therapy for B-ALL
Source: Research Square preprint supplement (doi:10.21203/rs.3.rs-7751632/v1), 2025-10-23
Supplement: Supplementary file 1 [file 37f5245d575da449d63e89c1.docx]

## *Clinical cohort, study design and procedures*

Between June 2016 and September 2019, 91 patients with CD19+CD22+ r/r B-ALL received CAR19 and CAR22 T cell “cocktail” infusion and were included in following analysis,with a cutoff date for data collection was 2 years post CAR T cell infusion. The study design was approved by the institutional review board of Tongji Hospital, Tongji Medical College, Huazhong University of Science and Technology. The trial was registered with the Chinese Clinical Trial Registry (ChiCTR, number ChiCTR-OPN-16008526). Written informed consent was obtained from each participant in compliance with the Declaration of Helsinki. The protocol of the clinical research is described in the previously published article of our institution. Complete remission, relapse, and no response were determined as previously described4.

## *Laboratory assessments for patients*

Multiparameter flow cytometry (MFC) was used to screen and quantitate minimal residual disease (MRD) and the fraction of B lymphocytes in peripheral blood, bone marrow or cerebrospinal fluid (CSF). The median fluorescence intensity (MFI) was calculated to quantitate CD19 and CD22 expression of tumor cells, and normalized by MFI of normal cells to obtain nMFI reflecting the antigen densities of these two targets43,44. The antigen with a nMFI of ≥ 15 was classified as positive, while values ranging from 2 to less than 15 were considered dim, and values below 2 were categorized as negative. The fraction of B lymphocytes in peripheral blood was used to represent the in vivo function and pharmacodynamics of patients' CAR T cells. We used a fraction threshold of 0.5% to determine whether CD19-expressed B cells were restored. The fraction of B lymphocyte with equal to or greater than 0.5% was considered to be B cell recovery, while fractions below this threshold were B cell aplasia. The proliferation capacities of CAR19 and CAR22 T cells in vivo were assessed by quantifying the copy numbers of CAR19 and CAR22 lentiviruses in peripheral blood samples using droplet digital polymerase chain reaction (ddPCR). A case was classified as having minimal CAR T cell expansion or few CAR T cells if the copy numbers of both CAR19 T cells and CAR22 T cells were below 60. Cytogenetic and genomic aberrations were identified by karyotyping, real-time quantitative polymerase chain reaction (RT-qPCR), and targeted genome sequencing (Target-seq). Detailed methods were described previously45.

## *DNA extraction and whole genome sequencing*

For whole genome sequencing (WGS), approximately 200 ng of DNA per sample was used as the starting material for DNA sample preparations. Sequencing libraries were generated using the Truseq Nano DNA HT Sample Preparation Kit (Illumina, USA) according to the manufacturer's guidelines. The DNA sample was fragmented through sonication to achieve a size of 350 base pairs. Subsequently, the DNA fragments underwent end-repair, A-tailing, and ligation with the full-length adapter for Illumina sequencing, followed by PCR amplification. The PCR products were purified using the AMPure XP system and the libraries were analyzed for size distribution using the Agilent 2100 Bioanalyzer. Quantification was achieved through real-time PCR. These libraries were then sequenced on the Illumina HiSeq X10 platform with 150x2 bp paired-end reads, aiming to achieve a mean coverage of at least 40X.

## *Somatic mutation calling in WGS data*

Sequence data were aligned to the GRCh38 (hg38) reference genome using BWA-MEM (version 0.7.17),deduplicated and underwent base quality score recalibration using Picard (v2.26.2) and GATK (v4.2.2). The statistics for raw data and mapping metrics are summarized in Supplementary Tables 1.

Single nucleotide variants (SNVs) and small insertions/deletions (indels) were detected through a combination approach that integrated results from Mutect2 in GATK, VarScan (v2.4.4), and SomaticSniper (v1.05). Default parameters were used for all tools, with the exception of a quality threshold set to 30. For the case P28 lacking a normal control, germline variant calling was performed using Freebayes (v1.0.2), GATK, HaplotypeCaller, and Mutect2 in tumor-only mode, all with default parameters. For normal-tumor paired samples, mutations identified as somatic or loss of heterozygosity (LOH) by any of the aforementioned tools underwent further filtering. For tumor-only samples, mutations detected by at least two tools were considered for subsequent filtering. An in-house panel of normal was constructed from 43 Chinese WGS samples (buccal swab or skin DNA) using Mutect2 in tumor-only mode. Mutations were filtered to exclude those with read depth less than 6 or with fewer than 1 read in either the positive or negative strand. Remaining mutations were annotated using ANNOVAR (16 Jul 2017) against public databases, including gnomAD, 1000 Genomes, dbSNP150, ExAC, and COSMIC (v70). Additional filtering removed mutations with: (1) a minor allele frequency (MAF) > 1% in 1000 Genomes, dbSNP150, or ExAC; (2) a MAF >0.1% in ChinaMAP; (3) locations within genomic super-duplications; or (4) presence in our in-house panel of normals. Mutations predicted to be deleterious to gene function by at least one software were retained. All remaining non-silent mutations were manually reviewed using the Integrated Genome Viewer (IGV), and are shown in Supplementary Table 2.

Copy number variations (CNVs) were detected using Control-FREEC (v11.4) with default parameters, except for the window size set to 50,000 and the step size to 5,000. Shared, sample-specific, or patient-specific CNVs were identified with multiIntersectBed in BEDTools (v2.28) and annotated with our in-house scripts according to overlapping with gene locus plus upstream 2Kb and cytoband, which were downloaded from UCSC genome browser database. CNV regions identified and affected genes are shown in Supplementary Tables 3, 4, and 5.Mutational landscapes and gene schematic plots (lollipop plots) were generated using the R packages ComplexHeatmap and trackViewer, respectively. The karyoploteR R package was employed for visualizing and generating patient CNV profiles.

## *Mutation spectrum analysis of B-ALL patients*

We compiled multiple published mutation datasets from B-ALL patients, encompassing WGS, whole-exome sequencing (WES), and targeted sequencing (Target-seq) data. These datasets were compiled from multiple publications, including: Blood (2020), Scientific Reports (2019), Blood (2016), PNAS (2016), Nature Communications (2014), Blood Cancer Discovery (2020), and the Target-ALL dataset (Nature Genetics, 2022), with detailed information provided in Supplementary Table 6. Utilizing these resources, we characterized the mutation spectrum of *CD19*, *PAX5*, and other B-lineage genes in B-ALL patients, including SNVs, indels and CNV (details in Supplementary Tables 7 and 8). Additionally, we analyzed co-occurrence and mutual exclusivity among these B-lineage-associated genes (details in Supplementary Table 9). Specifically, the mutation and clinical data were used to investigate correlations between mutations in *PAX5*, *IKZF1*, and other B-lineage genes.

In addition, we utilized the RNA-seq dataset from Zhang Q, et al.26, which investigated CAR19 T cell therapy in B-ALL patients, to analyze the correlation between therapy resistance or relapse and mutations in *PAX5* and other B-lineage regulatory factors. Mutation analysis was conducted using the following strategy: Raw sequencing reads underwent quality control using Trimmomatic to remove low-quality bases and adapter sequences. Cleaned reads were aligned to the GRCh38 (hg38) reference genome using STAR aligner (v2.7.11a). Variant calling, including detection of SNVs and small indels, was performed following GATK Best Practices. Mutation sites were annotated using ANNOVAR (16 Jul 2017) against public databases, including gnomAD, 1000 Genomes, dbSNP150, ExAC, and COSMIC (v70). Bam-readcount was used to obtain the coverage, number of supporting reads, and VAFs for mutations in B-lineage regulatory factors at each time point (Supplementary Fig. 3f,g).

## *Clonal evolution analysis of B-ALL patients*

For each point mutation, baseline and relapse BAM files for each patient were first converted into mpileup files using samtools mpileup. An in-house Perl script was used to extract the coverage, read counts supporting the reference allele and mutant allele, followed by VAF calculation. SciClone (v1.1.0)46, a software specifically designed for clonal inference in multi-time-point samples, was used to identify the number and composition of subclones. Input data for SciClone included point mutation read counts, VAF information, and corresponding copy number data detected for each time point.

SciClone primarily focuses on variants within copy-number neutral, LOH-free genomic regions, allowing for accurate quantification of VAF and clonal inference. After subclone inference, outliers were manually reviewed to determine whether driver gene mutations in LOH regions should be re-included; such mutations were manually added to the appropriate clones. Subsequently, the R package “clonevol” was used to infer clonal composition, including the relationships between founder clones and subclones. In this process, the clonal structure is initially assessed based on a linear evolution model, and if not fitting, a branching evolution model is considered. Finally, the predicted subclonal structure was visualized using the R package "fishplot”. The clustered mutations and their copy numbers are detailed in Supplementary Table 2.

## *Gene knockout in human B malignant cell lines*

Human B malignant cell Nalm6 was used for *in vitro* functional experiments. Using the lentivirus CRISPR-Cas9 system, three gene knockout (KO) clones of the Nalm6 cell line including *PAX5* heterozygous knockout (*PAX5*+/-), *IKZF1* heterozygous knockout (*IKZF1*+/-), and double heterozygous knockout (*PAX5*+/-*IKZF1*+/-) were established as described before47. Genotypes were confirmed using Sanger sequencing, with the following genotypes identified: *PAX5* KO (+3/+2), *IKZF1* KO (-2/+4), and *PAX5* KO (0/+5)/*IKZF1* KO (+5/-14). The single-guide RNAs (sgRNA) used in the experiments are listed below.

gPAX5-F CACC GTGGAGGAGTGAATCAGCTTG

gPAX5-R AAAC CAAGCTGATTCACTCCTCCAC

gIKZF1-F CCAC GCTGGAGTATCGCTTACAGGG

gIKZF1-R AAAC CCCTGTAAGCGATACTCCAGC

***Quantification of protein molecules***

Western blot and flow cytometry were performed to evaluate total and surface protein expressions, respectively. The antibodies used for Western blot analysis were as follows: anti-PAX5 (Abcam, ab109443), anti-IKZF1 (Abcam, ab191394), anti-GAPDH (Antgene, ANT324), anti-CD19 (Cell Signaling Technology, 90176), anti-CD22 (R&D Systems, MAB19681). Goat anti-rat and goat anti-rabbit secondary antibodies for Western blot were purchased from Antgene. For flow cytometry, the antibodies used included: CD19-PE (CST, 90176), CD22-APC (R&D Systems, MAB19681), EGFR-A488 (Biolegend, 352907) for EGFR-labeled CAR19 T cells, CD107a-APC (BioLegend,328619), and CD8-PE-Cy7 (BioLegend, 980910). For CAR22 detection, CD22 protein (His-tagged, Acro) and anti-HIS-A488 antibody (MBL, D291-A48) were used.

## *Cell cytotoxicity assays*

All functional experiments were repeated three times, and the experimental data were obtained from single measurements of different samples. Results from one or more repeated experiment are presented for figures of functional experiments. Nalm6 cell cytotoxicity was assessed using the Antgene apoptosis kit. Nalm6 cells (and the Nalm6 gene KO cells described above) labeled with CFSE were co-incubated with CAR T cells or T cells at an effector-to-target (E/T) ratio of 0.5, 1, and 2 for 4 or 12 hours. Tumor cell apoptosis was assessed using Annexin V staining. CD107a expression in CD8+ T cells was detected by flow cytometry. IFN-γ was measured using an ELISA kit from Neobioscience. Differences in cytolysis fraction were compared among *PAX5*-mutated and wild type cell lines, with statistical significance determined using the t-test. P values are provided in Supplementary Table 10.

## *Gene expression analysis of B-ALL patients*

We analyzed the dataset EGAS00001002856 (n=40), which contains paired RNA-seq data from diagnosis and relapse samples of B-ALL patients, as published in Schroeder M. P, et al. 2019 Scientific Reports27. Using this dataset, we investigated the RNA expression correlation between the B-lineage transcription factors *PAX5,* *IKZF1* and B-cell surface antigens, including *CD19*, *CD22*, and others. The gene expression quantification data was sourced from the supplementary tables of the article. Pearson correlation coefficients were calculated between *PAX5*/*IKZF1* and B-cell antigen genes (e.g., *CD19*, *CD22*) to evaluate their relationships.

## *ChIP-seq and ATAC-seq data analysis of PAX5 knockout B-ALL cell lines*

To explore the regulatory roles and molecular mechanisms of *PAX5* and *IKZF1* mutations on *CD19* and *CD22* expression, we collected chromatin immunoprecipitation sequencing (ChIP-seq) and Assay for Transposase-Accessible Chromatin sequencing (ATAC-seq) data from the following publicly available B-ALL datasets (GSE126300, GSE202082, and GSE202081). These datasets were generated from Nalm6 parental cell line and 697 cell lines with four distinct genotypes including parental, WT/WT, WT/fs, and P80R/fs, which have been used to investigate the transcriptional and epigenetic regulation involving *PAX5* 28,29. The peak regions and enrichment levels (bed and bigwig files) in *PAX5* binding, accessible chromatin, and histone modifications (H3K4me3 and H3K27ac) were downloaded from the NCBI/GEO database. The genomic coordinates based on hg19 human reference genome using liftOver were converted onto GRCh38. UCSC genome browser was used to visualize binding and enrichment levels, as well as RefSeq genes and ENCODE cCRE. ENCODE cCRE track displays the ENCODE Registry of 926,535 candidate cis-Regulatory Elements (cCREs) in the human genome, which are representative DNase hypersensitive sites supported by either histone modifications (H3K4me3 and H3K27ac) or CTCF-binding data48. Promoter and enhancer regions were manually defined according to the presence of H3K4me3 and/or H3K27ac markers. Differences in transcription factor binding, chromatin accessibility, and histone modifications at enriched regions were compared between *PAX5*-mutated and wild type cell lines, and statistical significance was calculated with unpaired t test.

## *Statistical analysis*

Progression-free survival (PFS) was defined as the time from the first infusion to the first relapse, and overall survival (OS) as the time from the first infusion to death. Survival probabilities were estimated using the Kaplan-Meier method, and intergroup differences were assessed via the log-rank test. For comparisons of quantitative variables, the Mann-Whitney U test and t-test were used, while the chi-square test was applied to categorical variables. Correlation analyses were performed using Spearman’s rank correlation. All statistical analyses were conducted with GraphPad Prism 7/8 and SPSS software. A two-tailed P value < 0.05 was considered statistically significant.

## *Data availability*

WGS data used in this study were deposited into the Genome Sequence Archive for Human at the BIG data center, Beijing Institute of Genomics, Chinese Academy of Sciences and China National Center for Bioinformation under accession number HRA000038. The authors declare that all other data supporting the findings of the study are within the paper and its additional files (Supplementary Table 1-10). In addition, the complete public datasets used in this study are listed in Supplementary Table 6.

## *Code availability*

WGS, RNA-seq, ChIP-seq, ATAC-seq data analysis codes used in this study are available from the corresponding authors on reasonable request.
