# Supplementary material for: Unraveling Cellular and Molecular Mechanisms of Relapse in CD19/CD22 Dual-Targeting CAR T Therapy for B-ALL
Source: Research Square preprint supplement (doi:10.21203/rs.3.rs-7751632/v1), 2025-10-23
Supplement: Supplementary file 2 [file 71f4e2f314c32275d0797272.docx]

**Supplementary information**

The file contains Supplementary Figures 1-4.

# 1. Supplementary Figures

## Supplementary Fig. 1. Associations Between Clinical Outcomes and Factors Related to CAR19/22 T Cells and Leukemia Cells

a Schematic diagrams for CAR T cell manufacturing and clinical trial procedures. The manufacturing schema illustrates the CAR design, including the CD19-CD28-4-1BB-CD3ζ-CAR and CD22-CD28-4-1BB-CD3ζ-CAR, which consist of CD19 or CD22 single-chain variable fragments (scFvs), CD28 hinge and transmembrane domains, a 4-1BB costimulatory domain, and a CD3ζ signaling domain. The clinical trial schema outlines the key stages, including screening, lymphodepletion, CAR T cell infusion, disease evaluation time points, and the metrics to be assessed.

b Flow chart depicting patient treatment responses and prognostic assessments in this clinical trial, including the characteristics of leukemic and CAR T cells in relapsed patients. Patients were classified into early and late relapse groups based on whether relapse occurred within or beyond the median relapse time of 198.5 days. Relapse-associated characteristics and patient grouping were determined by the qualitative expression of CD19/CD22 antigen density at relapse compared to baseline levels. CR, complete remission; PR, partial remission; NR, no response; MRD, minimal residual disease; WGS, whole genome sequencing; ?, not available.

c Comparison of baseline CD19 antigen expression levels among patients with different CAR T treatment responses, and its correlations with progression-free survival (PFS) and overall survival (OS).

d Comparison of baseline CD22 antigen expression levels among patients with different CAR T treatment responses, and its correlations with PFS and OS.

e,f Correlations of CAR19 T cell infusion dose, CAR22 T cell infusion dose, and the CAR19 to CAR22 T cell infusion dose ratio with PFS in all patients (panel e) and relapsed patients (panel f).

g Correlation between baseline bone marrow (BM) tumor burden and time to relapse for all patients (left) and for relapsed patients (right).

*R* and *p* values for panels c-g were determined using Spearman correlation coefficient test. *P* values for panels c and d were calculated using the Wilcoxon rank-sum test.

## Supplementary Fig. 2. Genomic Features in *CD19*/*CD22* and Interacting Proteins for Early Relapse Patients with Dual Antigen Downmodulation

a,b Schematic representation of the treatment courses for patients P32 and P28, highlighting the sampling points at baseline and at relapse for WGS. yr, years old

c Flow cytometry plots show the gating of relapse 1 and relapse 2 bone marrow cells from patient P32 and the expression of target antigens (CD19 and CD22).

d Protein schematic of CD19 (NM_001770) illustrating the amino acids, protein domains, and positions of the somatic *CD19* mutation described in this study (in red) in relation to previously described somatic mutations in B-ALL.

e-i Copy-number variations (CNVs) encompassing the *CD22*, *CD81*, *CD225* (*IFITM1*), *CD21* (*CR2*), and *CD58* loci plus their upstream/downstream regions in baseline and relapse samples. Each sub-panel illustrates copy numbers and cytoband, with red and blue lines indicating gain and loss regions identified through WGS data, respectively. Brown lines denote the precise loci of the genes of interest. The clonal or subclonal status of CNVs is noted within parentheses. WT, wild type; Del, deletion; Amp, amplification.

## Supplementary Fig. 3. Mutation Spectra of Patients With Relapse of Dual Antigen Downmodulation and B-ALL Patients From Public Cohorts

a (left) Heatmap displays genes with point mutations in ≥2 B-ALL cases. Cases are separated into CAR T baseline, CAR T relapse, diagnosis, and relapse in context of traditional therapy (columns). The genes are shown ranked in order of recurrence (rows). Colors represent mutation types. (Right) Butterfly plot shows comparison in mutation recurrence in the genes shown as the left panel between diagnosis (royalblue) and relapse (brown) B-ALL cohorts. Asterisk indicates the statistical significance (two-sided Fisher’s exact test) for each gene.

b As in panel a, heatmap displays genes with CNVs in ≥2 B-ALL cases, and butterfly plot shows comparison in mutation recurrence in these genes between diagnosis (royalblue) and relapse (brown) B-ALL cohorts.

c Schematic representation of PAX5 (NM_016734) showing amino acids, protein domains, and the positions of somatic *PAX5* mutations identified in this study (in red). The mutations in relation to previously described somatic mutations in B-ALL are also shown.

d,e As in Supplementary Fig. 2, CNVs encompassing the *TP53* and *CDKN2A*/*B* loci plus their upstream/downstream regions in baseline and relapse *samples*.

f,g Line plots illustrate the changes of VAFs for *PAX5*, *IKZF1*, and *ETV6* at baseline and day 14 after CAR19 T therapy in the patients R-A and NR-B from the dataset of Zhang Q, et al., 2019 Genomics, Proteomics & Bioinformatics. TB, tumor burden; fs, frameshift; NR, no response.

h (left) Heatmap displaying CNV status of B-lineage associated genes in B-ALL cases from the TARGET-ALL cohort. The genes are ranked in decreasing order of their frequency of occurrence (rows). Colors represent mutation types. (right) Line with asterisks shows a significant cooccurrence of mutations between two genes displayed in the left panel. Asterisk indicates the statistical significance (two-sided Fisher’s exact test) for each gene.

i As in panel h, heatmap displaying CNV status of B-lineage associated genes in B-ALL cases from the public cohorts(left), and the line with asterisks shows the cooccurrence of mutations in these genes (right).

## Supplementary Fig. 4. Validation of PAX5 and IKZF1 knockout in Nalm6 cells and correlations between their expression and B-lineage genes in B-ALL patients

a Sanger sequencing verified the knockout of multiple nucleotides in the B-ALL Nalm6 cells, leading to a frameshift mutation and a premature stop codon in the *PAX5* gene. The chromatogram displays the breakpoint within the *PAX5*, with the box highlighting the WT nucleotides. The nucleotide triplets and the corresponding amino acids for the *PAX5* WT sequence are also depicted.

b As in panel a, Sanger sequencing confirmed the knockout of multiple nucleotides in B-ALL Nalm6 cells, causing a frameshift and a premature stop codon in the *IKZF1* gene.

c,d Scatter plot illustrating the correlation in expression levels between *PAX5*, *IKZF1*, and B-lineage genes in B-ALL patient samples from a published B-ALL dataset of Schroeder M. P. et al. 2019 *Scientific reports*1. Each point represents an individual sample. Samples from diagnosis and relapse are marked in blue and red points. R and *p* values for panels c and d were determined using Pearson’s correlation coefficient test.

e-h ChIP-seq (PAX5 binding, histone modification), and ATAC-seq (open chromatin) at B lineage genes (e.g. *CD21* (*CR2*), *CD20* (*MS4A1*), *CD23* (*FCER2*), *CD79A*, *CD81*, *CD225* (*IFITM1*), *CD58), myeloid markers* (e.g. *CD33*, *CD14)*, and *GAPDH* loci in Nalm6 parental cells and isogenic B-ALL 697 cells with various genotypes. Data were obtained from Li Y, *et al*. and Okuyama K, *et al*2,3. Left: Genomic tracks show enrichment regions (black rectangular bars) and signals (colorful bars) in cells with four genotypes (parental, WT/WT, WT/fs, and P80R/fs). ENCODE cCRE color-coded by regulatory signature (promoter-like, red; proximal enhancer-like, orange; distal enhancer-like, yellow; DNase-H3K4me3, pink; CTCF-only, blue). Red bars and grey lines mark promoter/enhancer regions. Right: Binding and enrichment comparison between *PAX5*-mutated and WT/WT cells with TSS (green) and PAX5 signal peaks (grey dashed lines, ±200/500 bp). Stats: t-test fold changes and *p*-values. TSS, transcription start site. ChIP-seq, chromatin immunoprecipitation sequencing; ATAC-seq, Assay for Transposase-Accessible Chromatin sequencing.

# References:

1 Schroeder, M. P. *et al.* Integrated analysis of relapsed B-cell precursor Acute Lymphoblastic Leukemia identifies subtype-specific cytokine and metabolic signatures. *Scientific reports* **9**, 4188, doi:10.1038/s41598-019-40786-1 (2019).

2 Okuyama, K. *et al.* PAX5 is part of a functional transcription factor network targeted in lymphoid leukemia. *PLoS genetics* **15**, e1008280, doi:10.1371/journal.pgen.1008280 (2019).

3 Li, Y. *et al.* PAX5 epigenetically orchestrates CD58 transcription and modulates blinatumomab response in acute lymphoblastic leukemia. *Science advances* **8**, eadd6403, doi:10.1126/sciadv.add6403 (2022).
